# Supplementary material
Source: PubMed Central journal article supplement (PMC8565774)

**Supporting Figure 1.** Gadolinium enhanced MRI images or contrast enhanced CT images as well as hyperpolarized  $^{13}\text{C}$  pyruvate AUC images of renal tumors in patients enrolled in the study. The patient numbering corresponds to that in Table 1. The two cases excluded from the data analysis (last 2 rows) show very low level of perfusion on the gadolinium enhanced images, which likely contributes to the very low SNR on the hyperpolarized  $^{13}\text{C}$  pyruvate images.

| Patient | Gadolinium enhanced MRI images or contrast enhanced CT images                       | $^{13}\text{C}$ pyruvate images                                                      | Pathology                |
|---------|-------------------------------------------------------------------------------------|--------------------------------------------------------------------------------------|--------------------------|
| 1       |    |    | Chromophobe RCC          |
| 2       |   |   | Clear Cell RCC (grade 2) |
| 3       |  |  | Chromophobe RCC          |
| 4       |  |  | Clear cell RCC (grade 2) |
| 5       |  |  | Clear cell RCC (grade 3) |

|                  |                                                                                     |                                                                                     |                          |
|------------------|-------------------------------------------------------------------------------------|-------------------------------------------------------------------------------------|--------------------------|
| 6                | 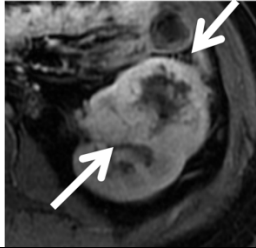   |    | Clear cell RCC (grade 4) |
| 7                |    |    | Clear cell RCC (grade 2) |
| 8                |    |    | Clear cell RCC (grade 3) |
| Excluded case -1 |   |   | Clear cell RCC (grade 2) |
| Excluded case -2 |  |  | Clear cell RCC (grade 2) |

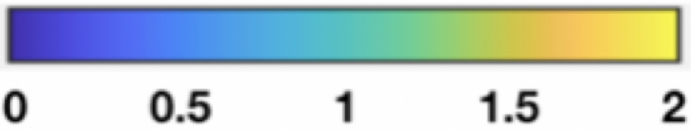

**Supporting Figure 2.** Bolus arrival time in the kidneys from the beginning of injection.

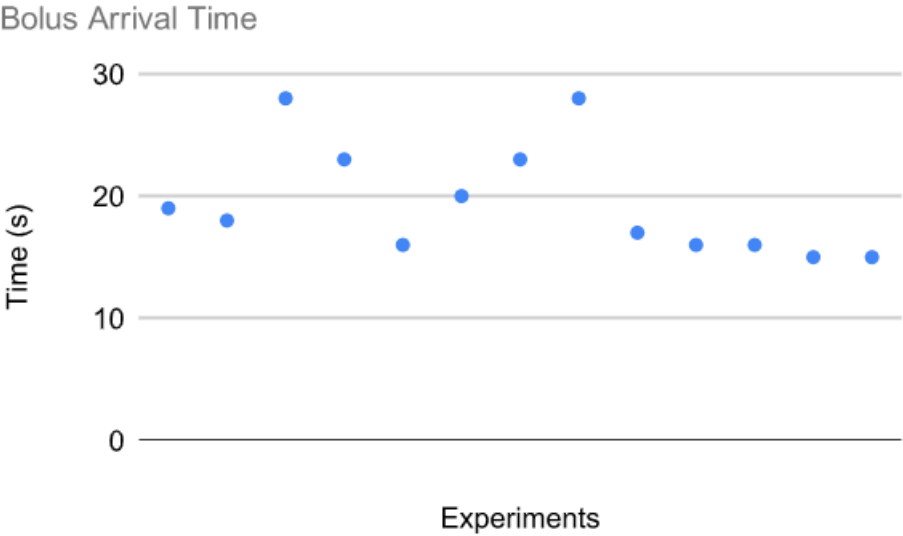

**Supporting Figure 3.** Real-time measured frequency (**A**) and power (**B**).  
**A)**

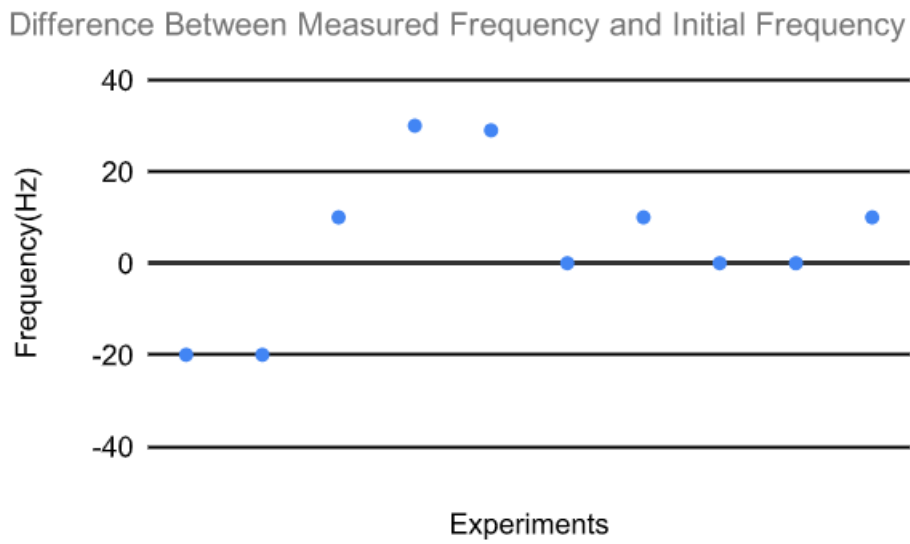

**B)**

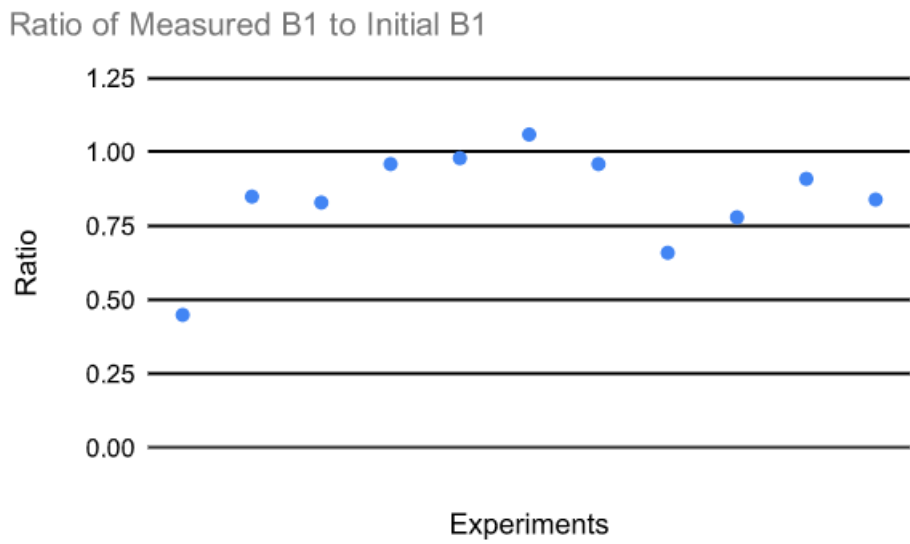

**Supporting Figure 4.** Area-under-the-curve (AUC) images from hyperpolarized  $^{13}\text{C}$  pyruvate MRI in patient where  $^{13}\text{C}$  images were acquired for both kidneys. For patients 1, 3 and 6,  $^{13}\text{C}$  images were only acquired of the kidney containing tumor, as patient 3 had a solitary tumor, and patient 1 and 6 had tumors that were located more laterally and anteriorly (thus instead of placing the second paddle coil posteriorly to the contralateral kidney, the coil was placed anterior-laterally over the side containing the tumor).

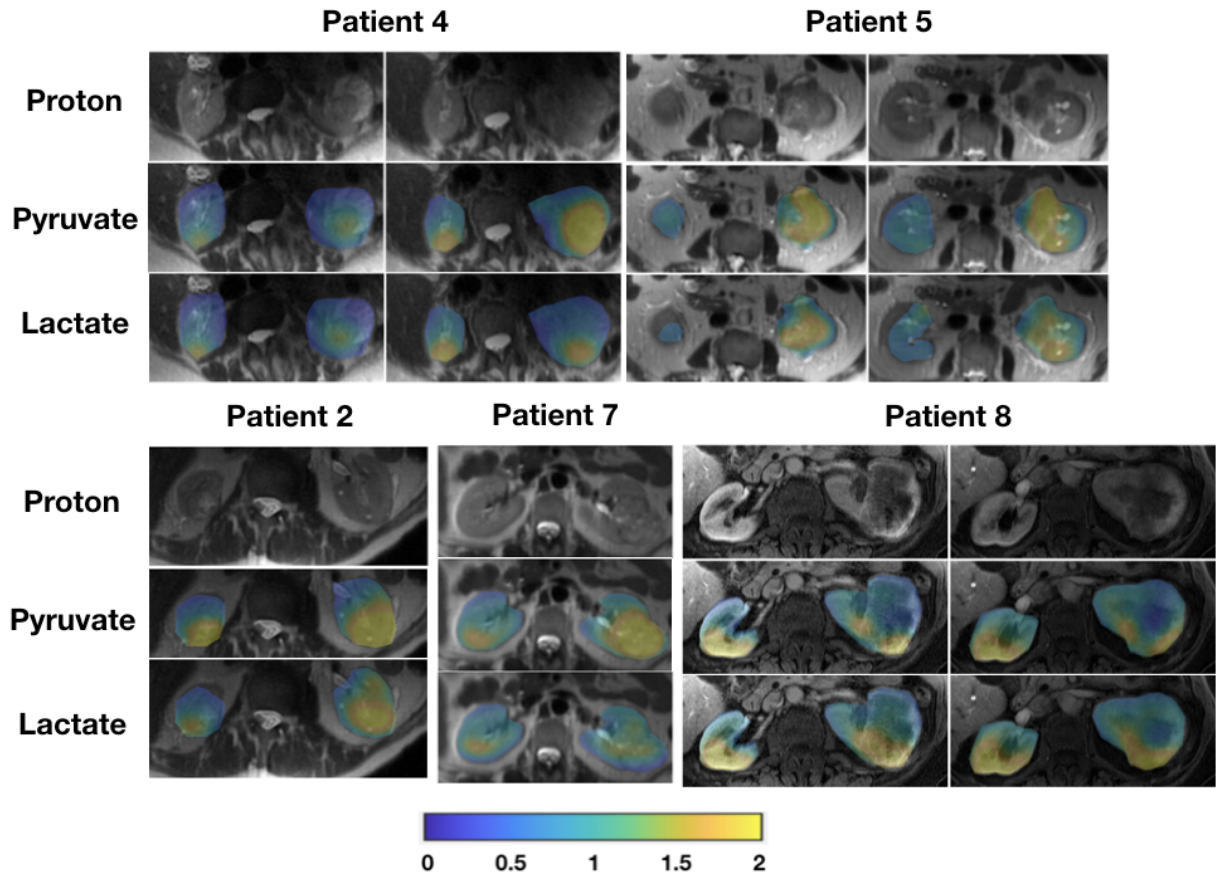

Supplement: NIHMS1748342-supplement-Figures1-4.pdf [file NIHMS1748342-supplement-Figures1-4.pdf]
